# Supplementary material
Source: PubMed Central journal article supplement (PMC3143276)

Supplementary Fig 1

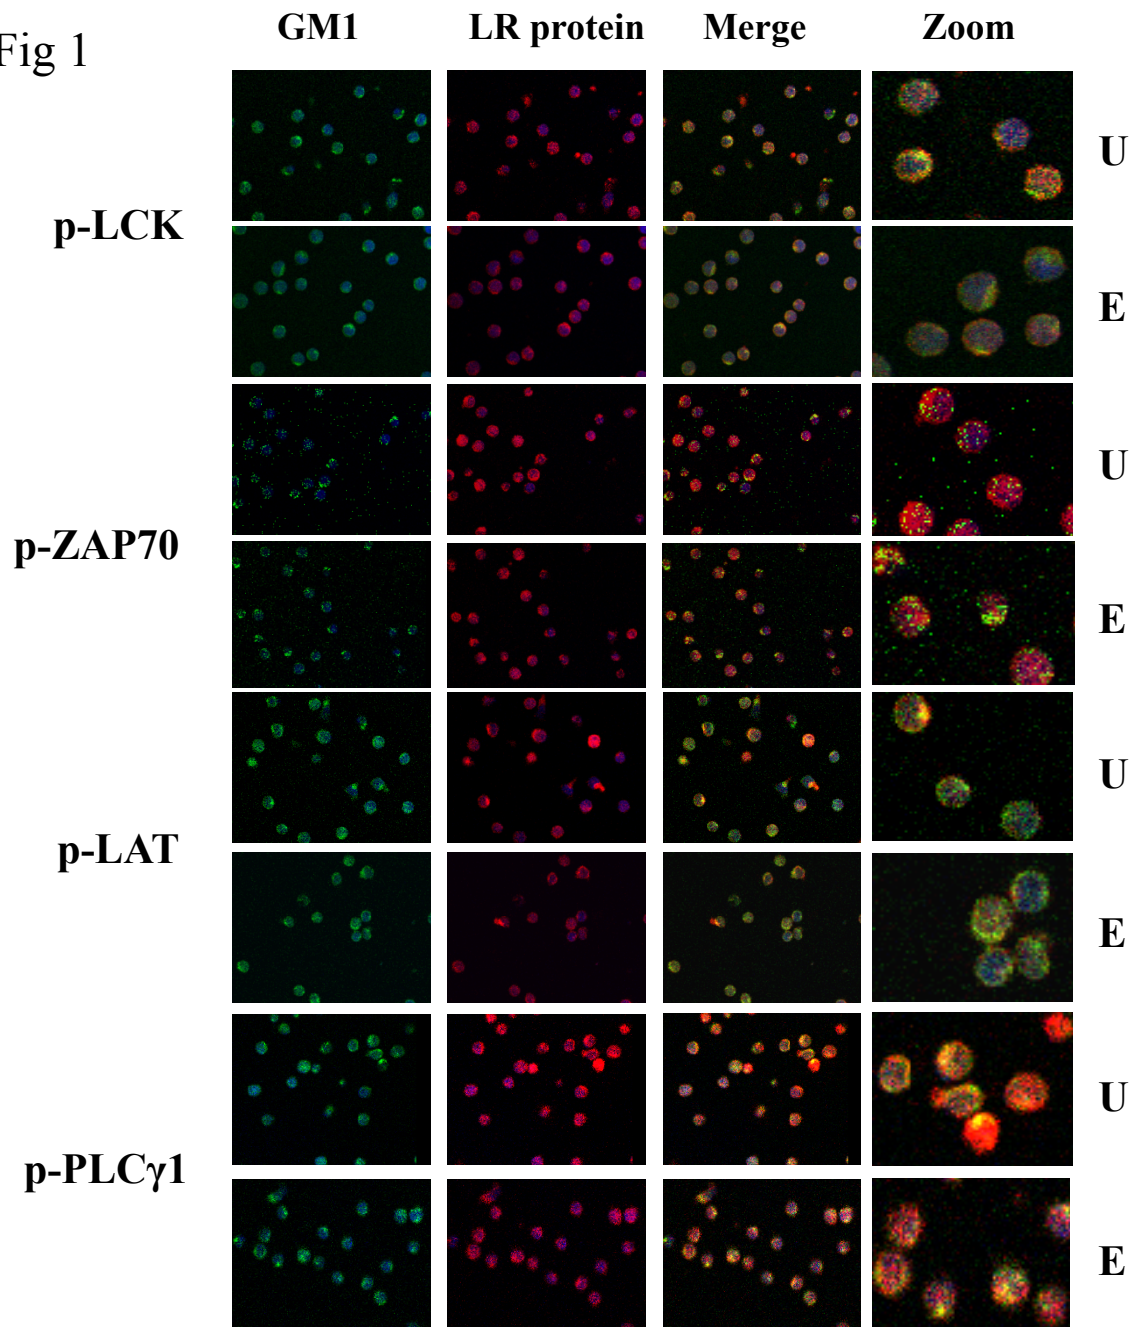

Supplement: NIHMS275754-supplement-Supp_Figure_S1.pdf [file NIHMS275754-supplement-Supp_Figure_S1.pdf]
